# Supplementary material
Source: publisher site journal article supplement (https://www.spandidos-publications.com/337/downloadSupplementary)

Figure S1. Protein-protein interaction network of common differentially expressed genes. Nodes represent proteins and lines represent interactions. Red nodes, upregulated genes; blue nodes, downregulated genes.

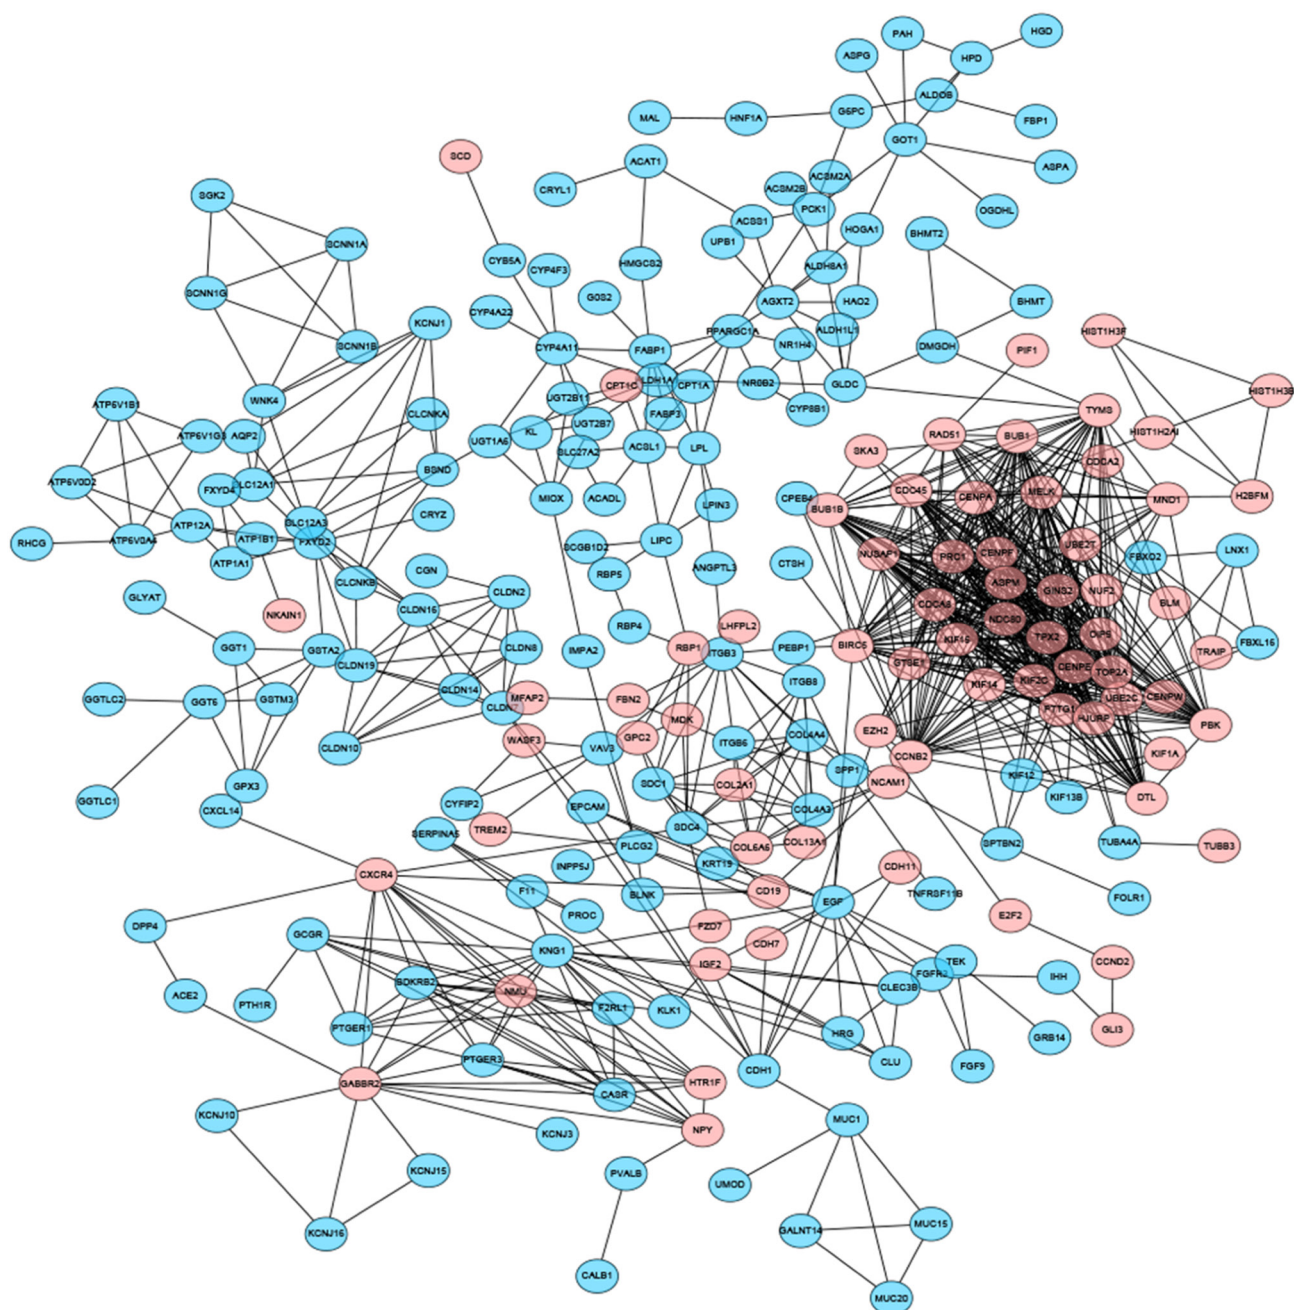

Supplement: Supplementary file 1 [file downloadSupplementary]
